# Supplementary material for: Role of Regulatory Immune Cells and Molecules in Autoimmune Bullous Dermatoses
Source: PubMed Central journal article supplement (PMC6688483; doi:10.3389/fimmu.2019.01746), 2019-08-02
Supplement: Image_1.pdf [file Image_1.pdf]

*Supplementary Material*

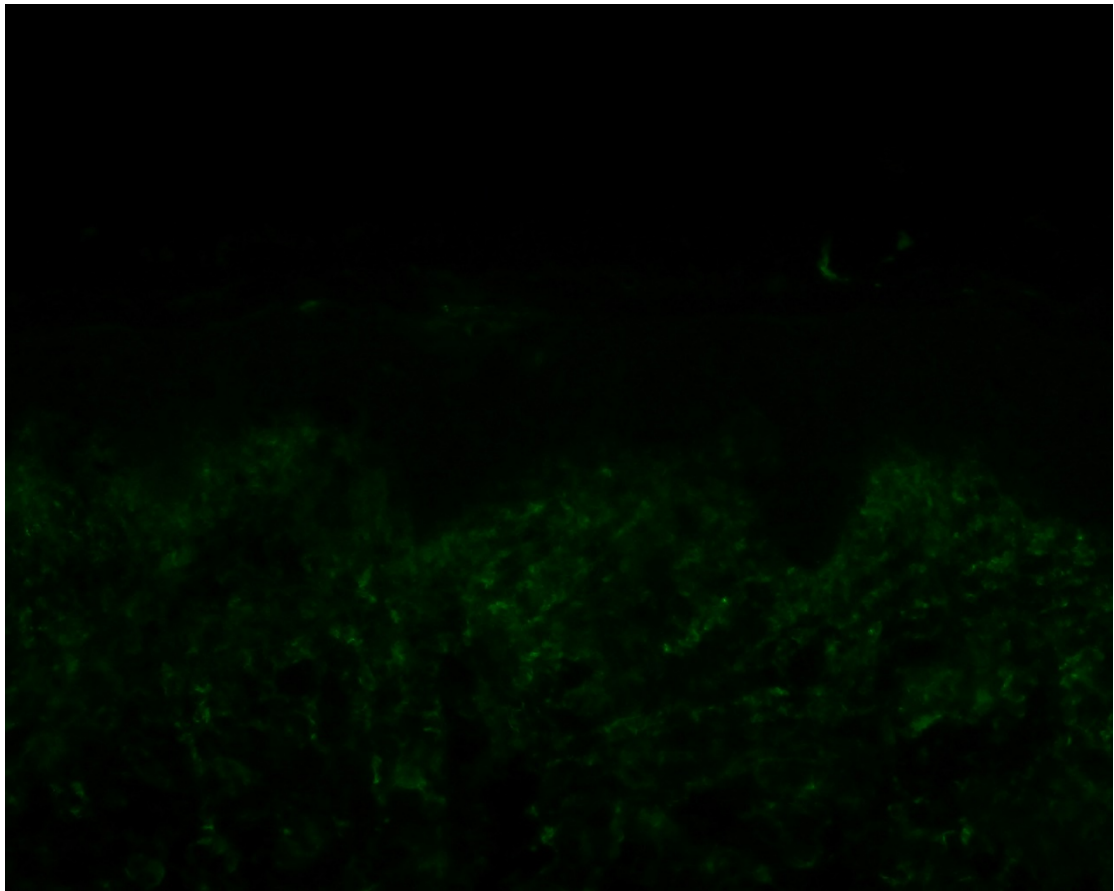

**Supplementary Figure 1. IgG staining for normal skin.** DIF of normal skin from healthy donor shows no specific fluorescence in the epidermis or the dermoepidermal junction.
